# Supplementary material for: The effect of terminal groups of viologens on their binding behaviors and thermodynamics upon complexation with sulfonated calixarenes
Source: Royal Society of Chemistry journal article supplement (doi:10.1039/c5ob00053j), 2015-01-01
Supplement: c5ob00053j1.pdf [file c5ob00053j1.pdf]

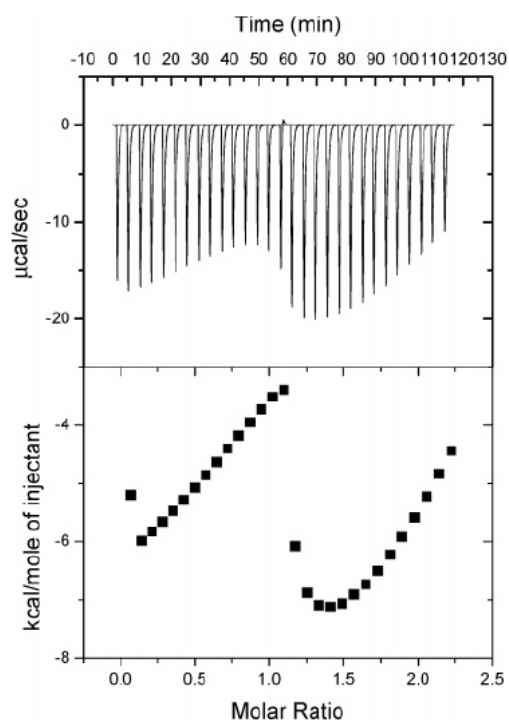

**Figure S1.** Two step binding of heat effects of complexation of  $\text{BnV}^{2+}$  (10.5 mmol) with STC4A (1.06 mmol) for each injection during the titration microcalorimetric experiment (*Cryst. Growth Des.* **2005**, 5, 231–235).

**Table S1.** Chemical Shift Changes ( $\Delta\delta$ , ppm) of MV<sup>2+</sup> Protons in the Presence of STC4A at pD 7.2<sup>a,b</sup>

| host  | CH <sub>3</sub> | <i>a</i> -H | <i>b</i> -H |
|-------|-----------------|-------------|-------------|
| STC4A | −0.71           | −0.88       | −0.86       |

<sup>a</sup>  $\Delta\delta = \delta(\text{presence of 1 equiv of host}) - \delta(\text{free guest})$ . Negative values indicate upfield shift. <sup>b</sup> The host and guest were mixed in a 1:1 stoichiometry at 10 mM.

**Table S2.** Chemical Shift Changes ( $\Delta\delta$ , ppm) of EV<sup>2+</sup> Protons in the Presence of SC4A, SC5A and STC4A at pD 7.2<sup>a,b</sup>

| host  | CH <sub>3</sub> | CH <sub>2</sub> | <i>a</i> -H | <i>b</i> -H |
|-------|-----------------|-----------------|-------------|-------------|
| SC4A  | −1.12           | −1.10           | −0.64       | −0.25       |
| SC5A  | −0.47           | −0.74           | −0.93       | −0.95       |
| STC4A | −0.48           | −0.68           | −0.69       | −0.60       |

<sup>a</sup>  $\Delta\delta = \delta(\text{presence of 1 equiv of host}) - \delta(\text{free guest})$ . Negative values indicate upfield shift. <sup>b</sup> The host and guest were mixed in a 1:1 stoichiometry at 10 mM.

**Table S3.** Chemical Shift Changes ( $\Delta\delta$ , ppm) of PV<sup>2+</sup> Protons in the Presence of SC4A, SC5A and STC4A at pD 7.2<sup>a,b</sup>

| host  | CH <sub>3</sub> | CH <sub>2</sub> -1 | CH <sub>2</sub> -2 | <i>a</i> -H | <i>b</i> -H |
|-------|-----------------|--------------------|--------------------|-------------|-------------|
| SC4A  | −1.10           | −1.30              | −1.23              | −0.57       | −0.15       |
| SC5A  | −0.46           | −0.63              | −0.82              | −1.04       | −0.95       |
| STC4A | −0.71           | −0.71              | −0.69              | −0.51       | −0.32       |

<sup>a</sup>  $\Delta\delta = \delta(\text{presence of 1 equiv of host}) - \delta(\text{free guest})$ . Negative values indicate upfield shift. <sup>b</sup> The host and guest were mixed in a 1:1 stoichiometry at 10 mM.

**Table S4.** Chemical Shift Changes ( $\Delta\delta$ , ppm) of  $BV^{2+}$  Protons in the Presence of SC4A, SC5A and STC4A at pD 7.2<sup>a,b</sup>

| host  | CH <sub>3</sub> | CH <sub>2</sub> -1 | CH <sub>2</sub> -2 | CH <sub>2</sub> -3 | <i>a</i> -H | <i>b</i> -H |
|-------|-----------------|--------------------|--------------------|--------------------|-------------|-------------|
| SC4A  | −0.93           | −0.87              | −0.89              | −0.81              | −0.38       | −0.12       |
| SC5A  | −0.30           | −0.51              | −0.58              | −0.73              | −0.88       | −0.81       |
| STC4A | −0.58           | −0.59              | −0.51              | −0.49              | −0.31       | −0.17       |

<sup>a</sup>  $\Delta\delta = \delta(\text{presence of 1 equiv of host}) - \delta(\text{free guest})$ . Negative values indicate upfield shift. <sup>b</sup> The host and guest were mixed in a 1:1 stoichiometry at 10 mM.

**Table S5.** Chemical Shift Changes ( $\Delta\delta$ , ppm) of  $BnV^{2+}$  Protons in the Presence of SC4A and SC5A at pD 7.2<sup>a,b</sup>

| host | H-1   | H-2   | H-3   | CH <sub>2</sub> | <i>a</i> -H | <i>b</i> -H |
|------|-------|-------|-------|-----------------|-------------|-------------|
| SC4A | −1.36 | −1.14 | −0.83 | −0.57           | −0.43       | −0.19       |
| SC5A | −0.36 | −0.44 | −0.72 | −0.97           | −1.03       | −0.89       |

<sup>a</sup>  $\Delta\delta = \delta(\text{presence of 1 equiv of host}) - \delta(\text{free guest})$ . Negative values indicate upfield shift. <sup>b</sup> The host and guest were mixed in a 1:1 stoichiometry at 10 mM.

## ITC Curves:

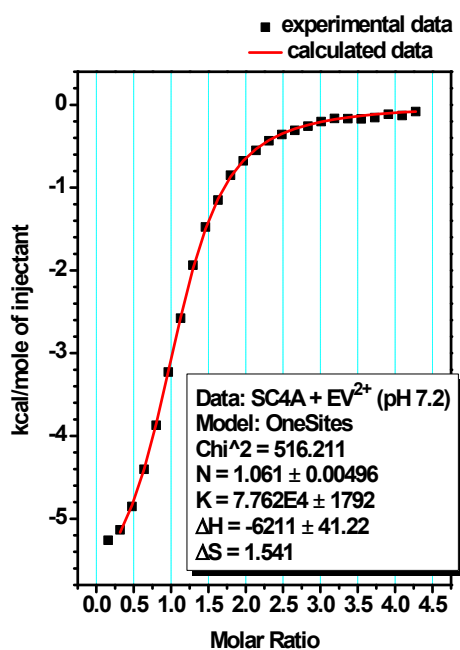

(a)

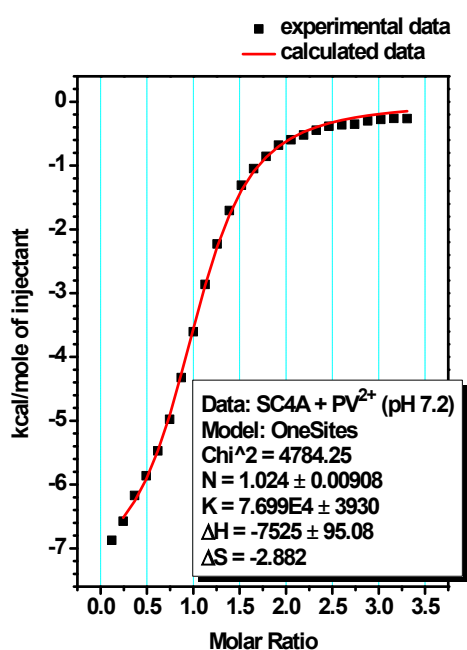

(b)

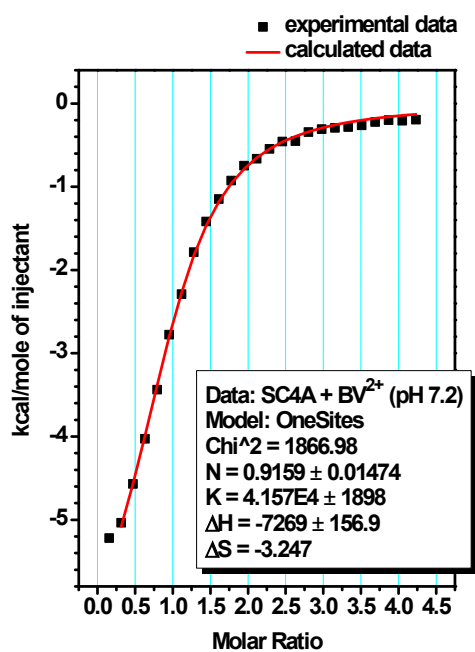

(c)

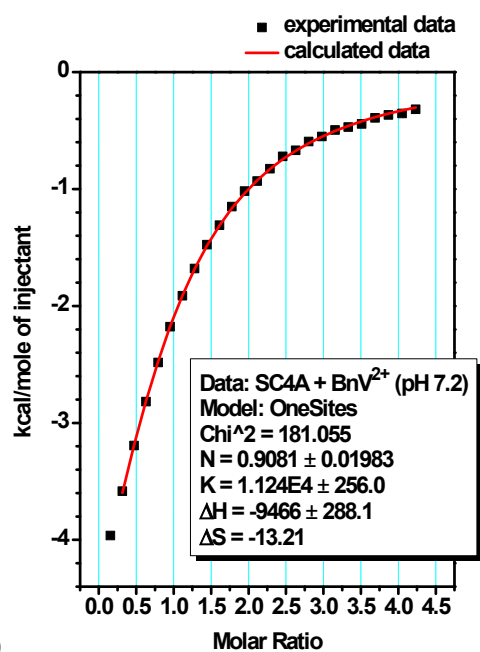

(d)

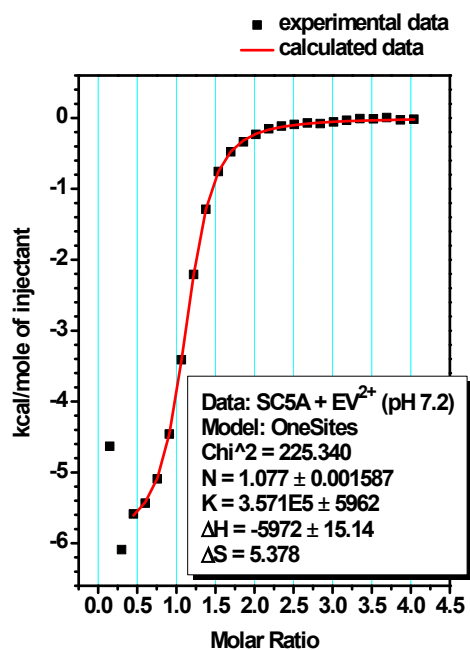

(e)

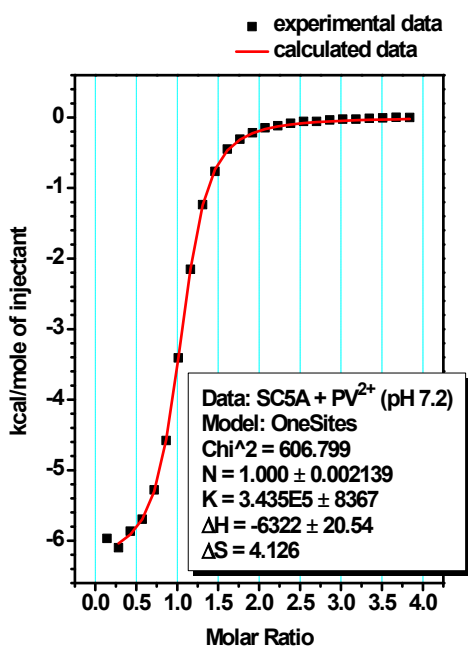

(f)

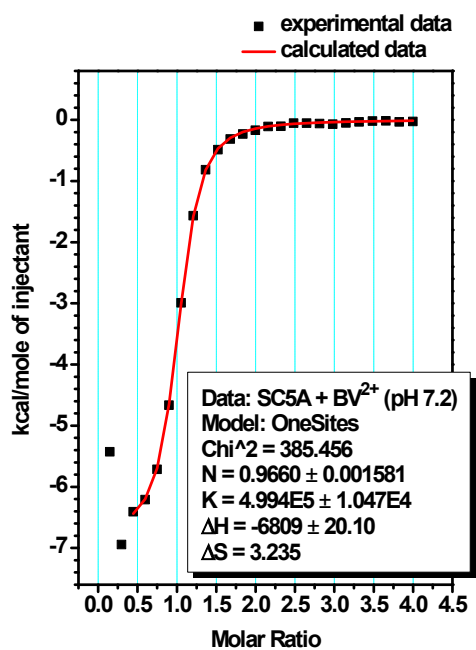

(g)

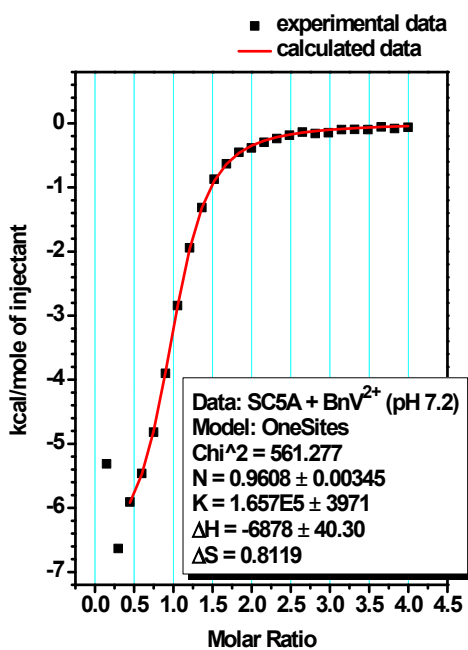

(h)

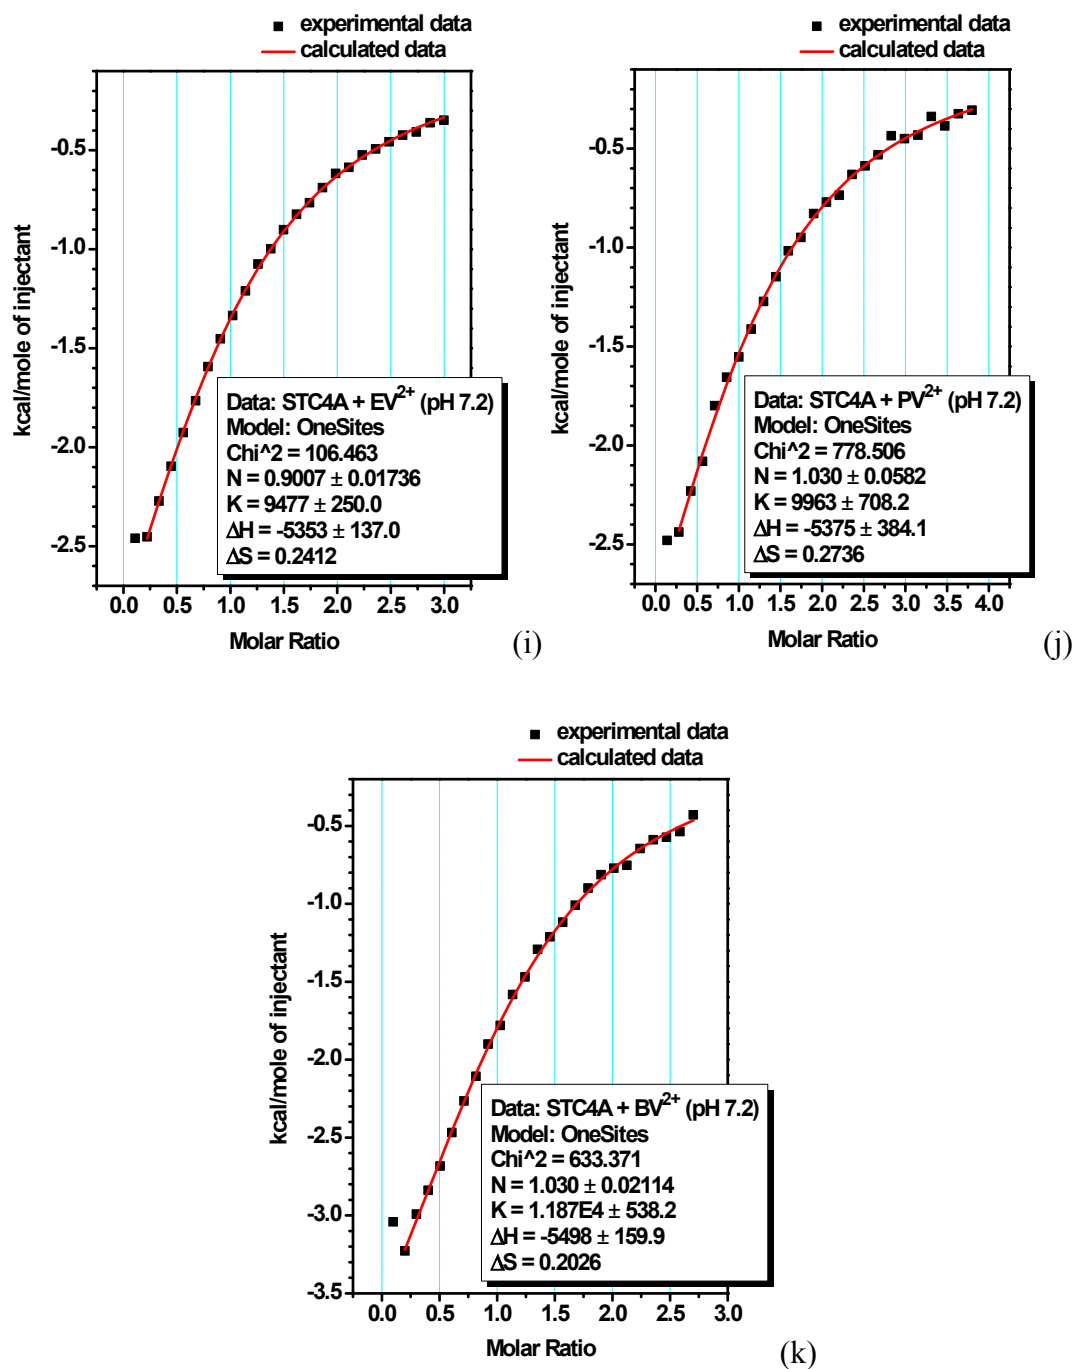

**Figure S2.** “Net” heat effects of complexation of viologens with SC4A, SC5A, and STC4A for each injection, obtained by subtracting the dilution heat from the reaction heat, which was fitted by computer simulation using the “one set of binding sites” model.
